# Supplementary material for: Patient Navigation Activities in a Large Community -Based Colorectal Cancer Screening Program
Source: Research Square preprint supplement (doi:10.21203/rs.3.rs-8264168/v1), 2025-12-19
Supplement: Supplementary file 1 [file 811fe3daf706e11388f10217.docx]

Supplementary Table A. Multiple Regression results from model predicting number of navigation activities from participant sociodemographic and health-related variables. The only significant predictor of number of navigation contacts was colonoscopy group; participants in the FIT Positive group required more navigation contacts than the High-Risk group.

| Linear Regression Predicting Total Activities | | | | |
| --- | --- | --- | --- | --- |
| **Variable** | **β***1* | **SE** | **95% CI** | **p-value** |
| (Intercept) | 13*** | 3.58 | 6.2, 20 | <0.001 |
| **Colonoscopy Group** |  |  |  |  |
| FIT Screen/Diagnostic Colonoscopy | — | — | — |  |
| Screening Colonoscopy | -1.6** | 0.605 | -2.8, -0.42 | 0.008 |
| **Gender** | -0.31 | 0.665 | -1.6, 1.0 | 0.647 |
| **Income** |  |  |  |  |
| <10,000 | — | — | — |  |
| 10,000-<25,000 | -0.66 | 0.776 | -2.2, 0.87 | 0.393 |
| >25,000 | -1.1 | 1.33 | -3.7, 1.6 | 0.430 |
| Unknown | -1.0 | 0.716 | -2.4, 0.38 | 0.152 |
| **Years in United States** | -0.01 | 0.050 | -0.11, 0.09 | 0.794 |
| **Preferred Language** |  |  |  |  |
| English | — | — | — |  |
| Spanish | 0.35 | 1.56 | -2.7, 3.4 | 0.824 |
| Both | -1.3 | 1.46 | -4.2, 1.6 | 0.366 |
| **Country of Origin** |  |  |  |  |
| USA | — | — | — |  |
| Mexico | -0.69 | 1.02 | -2.7, 1.3 | 0.497 |
| Other | -1.8 | 2.45 | -6.7, 3.0 | 0.453 |
| **High School diploma** |  |  |  |  |
| No | — | — | — |  |
| Yes | 0.21 | 0.643 | -1.1, 1.5 | 0.748 |
| **Working Status** |  |  |  |  |
| No | — | — | — |  |
| Yes, part time | 0.39 | 0.770 | -1.1, 1.9 | 0.617 |
| Yes, full time | -0.42 | 0.795 | -2.0, 1.1 | 0.597 |
| **Has a regular physician** |  |  |  |  |
| No | — | — | — |  |
| Yes | 0.34 | 0.590 | -0.82, 1.5 | 0.564 |
| **Doctor previously recommended testing for CRC** |  |  |  |  |
| No | — | — | — |  |
| Yes | -0.64 | 0.860 | -2.3, 1.1 | 0.459 |
| **Before today, heard of CRC** |  |  |  |  |
| No | — | — | — |  |
| Yes | -0.15 | 0.655 | -1.4, 1.1 | 0.818 |
| **Self-Reported Health** |  |  |  |  |
| Poor/Fair | — | — | — |  |
| Good | -0.29 | 1.10 | -2.5, 1.9 | 0.795 |
| Very Good/Excellent | -1.1 | 1.08 | -3.2, 1.1 | 0.319 |
| **Ever Screened for CRC Before** |  |  |  |  |
| No | — | — | — |  |
| Yes | 0.73 | 0.803 | -0.86, 2.3 | 0.368 |
| Abbreviations: CI = Confidence Interval, SE = Standard Error | | | | |
| Note. *p < .05, **p < .01, ***p < .001. | | | | |
| *1* *p<0.05; **p<0.01; ***p<0.001 | | | | |

| Supplementary Table B. Results of logistic regression predicting experiencing a barrier to screening. The only significant predictor of experiencing barriers to screening was having a full-time job; participants who had full-time jobs reported having fewer barriers than participants with part-time or no employment.   | Logistic Regression Predicting Barriers to CRC Screening | | | | | | --- | --- | --- | --- | --- | | **Variable** | **OR***1* | **SE** | **95% CI** | **p-value** | | **(Intercept)** | 0.44 | 2.26 | 0.00, 36 | 0.715 | | **Colonoscopy Group** |  |  |  |  | | FIT Screen/Diagnostic Colonoscopy | — | — | — |  | | Screening Colonoscopy | 0.63 | 0.373 | 0.30, 1.3 | 0.218 | | **Gender** | 0.89 | 0.428 | 0.39, 2.1 | 0.795 | | **Income** |  |  |  |  | | <10,000 | — | — | — |  | | 10,000-<25,000 | 1.1 | 0.492 | 0.41, 2.8 | 0.893 | | >25,000 | 0.73 | 0.942 | 0.09, 4.2 | 0.738 | | Unknown | 0.60 | 0.446 | 0.25, 1.4 | 0.251 | | **Age (years)** | 1.0 | 0.032 | 0.94, 1.1 | 0.989 | | **Language** |  |  |  |  | | English | — | — | — |  | | Spanish | 0.74 | 1.06 | 0.09, 6.2 | 0.772 | | Both | 0.20 | 1.08 | 0.02, 1.6 | 0.132 | | **Country of Origin** |  |  |  |  | | USA | — | — | — |  | | Mexico | 2.1 | 0.756 | 0.52, 11 | 0.320 | | Other | 1.3 | 1.59 | 0.04, 28 | 0.870 | | **High School diploma** |  |  |  |  | | No | — | — | — |  | | Yes | 0.88 | 0.408 | 0.39, 2.0 | 0.759 | | **Working Status** |  |  |  |  | | Yes, full time | — | — | — |  | | No | 3.6* | 0.559 | 1.2, 11 | 0.023 | | Yes, part time | 4.1* | 0.619 | 1.3, 14 | 0.023 | | **Has a regular physician** |  |  |  |  | | No | — | — | — |  | | Yes | 0.98 | 0.371 | 0.47, 2.0 | 0.958 | | **Doctor previously recommended testing for CRC** |  |  |  |  | | No | — | — | — |  | | Yes | 0.52 | 0.583 | 0.15, 1.6 | 0.260 | | **Previously heard of CRC** |  |  |  |  | | No | — | — | — |  | | Yes | 0.92 | 0.398 | 0.42, 2.0 | 0.828 | | **Self-Reported Health** |  |  |  |  | | Poor/Fair | — | — | — |  | | Good | 0.85 | 0.720 | 0.21, 3.7 | 0.822 | | Very Good/Excellent | 0.99 | 0.695 | 0.25, 4.1 | 0.986 | | **Previously Screened for CRC** |  |  |  |  | | No | — | — | — |  | | Yes | 0.40 | 0.547 | 0.13, 1.1 | 0.095 | | Abbreviations: CI = Confidence Interval, OR = Odds Ratio, SE = Standard Error | | | | | | Note. *p < .05, **p < .01, ***p < .001. | | | | | | *1* *p<0.05; **p<0.01; ***p<0.001 | | | | | |
| --- | --- | --- | --- | --- | --- | --- | --- | --- | --- | --- | --- | --- | --- | --- | --- | --- | --- | --- | --- | --- | --- | --- | --- | --- | --- | --- | --- | --- | --- | --- | --- | --- | --- | --- | --- | --- | --- | --- | --- | --- | --- | --- | --- | --- | --- | --- | --- | --- | --- | --- | --- | --- | --- | --- | --- | --- | --- | --- | --- | --- | --- | --- | --- | --- | --- | --- | --- | --- | --- | --- | --- | --- | --- | --- | --- | --- | --- | --- | --- | --- | --- | --- | --- | --- | --- | --- | --- | --- | --- | --- | --- | --- | --- | --- | --- | --- | --- | --- | --- | --- | --- | --- | --- | --- | --- | --- | --- | --- | --- | --- | --- | --- | --- | --- | --- | --- | --- | --- | --- | --- | --- | --- | --- | --- | --- | --- | --- | --- | --- | --- | --- | --- | --- | --- | --- | --- | --- | --- | --- | --- | --- | --- | --- | --- | --- | --- | --- | --- | --- | --- | --- | --- | --- | --- | --- | --- | --- | --- | --- | --- | --- | --- | --- | --- | --- | --- | --- | --- | --- | --- | --- | --- | --- | --- | --- | --- | --- | --- | --- | --- | --- | --- | --- | --- | --- | --- | --- | --- | --- | --- | --- | --- | --- | --- | --- | --- | --- | --- | --- | --- | --- | --- | --- | --- | --- | --- | --- | --- | --- | --- | --- | --- | --- | --- | --- | --- | --- | --- | --- | --- | --- | --- | --- | --- | --- | --- | --- | --- | --- | --- | --- | --- | --- | --- | --- |

Supplementary Table C. Mean of most frequently performed navigation activities by navigation duration group.

| **Navigation Activity** | **Low Duration (n = 179)**  **M (SD)** | **High Duration (n = 21)**  **M (SD)** | ***t*** | ***p*** |
| --- | --- | --- | --- | --- |
| **Scheduling** | 2.58 (1.69) | 3.10 (2.12) | 1.28 | .20 |
| **Reminder Calls** | 1.55 (1.11) | 1.52 (0.93) | .11 | .91 |
| **Communicating results** | 1.15 (0.86) | 1.67 (0.91) | 2.57 | .011 |
| **Gathering medical information** | 0.74 (0.56) | 0.86 (0.48) | .09 | .35 |
| **Intake visit** | 0.73 (0.44) | 0.90 (0.30) | 1.74 | .084 |
| **Arrange transportation** | 0.13 (0.40) | 0.57 (1.03) | 1.96 | .064 |
| **Unsuccessful contact** | 1.89 (1.92) | 1.86 (2.39) | .08 | .94 |
